# Supplementary material for: Ionophore-Based Polymeric Sensors for Potentiometric Assay of the Anticancer Drug Gemcitabine in Pharmaceutical Formulation: A Comparative Study
Source: MDPI journal article supplement (doi:10.3390/molecules28227552), 2023-11-12
Supplement: s1 [file s1]

**Table S1.** Effect of ion-exchanger on the electrode response.

| Ion-exchange, mg      | Sensor 1       | Sensor 2     | Sensor 3     |
|-----------------------|----------------|--------------|--------------|
| 0<br>2<br>3<br>5<br>7 | Slope $\pm$ SD |              |              |
|                       | 40 $\pm$ 0.4   | 43 $\pm$ 0.5 | 42 $\pm$ 0.5 |
|                       | 48 $\pm$ 0.4   | 53 $\pm$ 0.5 | 52 $\pm$ 0.5 |
|                       | 52 $\pm$ 0.5   | 55 $\pm$ 0.4 | 54 $\pm$ 0.4 |
|                       | 52 $\pm$ 0.3   | 56 $\pm$ 0.4 | 55 $\pm$ 0.3 |
|                       | 52 $\pm$ 0.3   | 56 $\pm$ 0.3 | 55 $\pm$ 0.3 |

\*slope  $\pm$  SD (n=3)

**Table S2.** Effect of immersion time on the electrode response of  $1 \times 10^{-4}$  M of GT

| Soaking time, min | Sensor 1 | Sensor 2 | Sensor 3 |
|-------------------|----------|----------|----------|
| 0.25              | 20       | 10       | 11       |
| 0.5               | 25       | 15       | 15       |
| 1.5               | 35       | 20       | 20       |
| 2                 | 40       | 20       | 20       |
| 2.5               | 40       | 20       | 20       |
| 3                 | 40       | 20       | 20       |
| 24                | 40       | 20       | 20       |
| 48                | 40       | 20       | 20       |
| 72                | 40       | 20       | 20       |
| 96                | 40       | 20       | 20       |
| 120               | 40       | 20       | 20       |
